# Supplementary material for: Cryotemplation for the rapid fabrication of porous, patternable photopolymerized hydrogels
Source: Royal Society of Chemistry journal article supplement (doi:10.1039/c4tb00585f), 2014-01-01
Supplement: c4tb00585f1.pdf [file c4tb00585f1.pdf]

1

2 **Cryotemplation for the Rapid Fabrication of Porous, Patternable Photopolymerized**

3 **Hydrogels**

4

5 Aline M. Thomas<sup>a</sup>, Lonnie D. Shea<sup>\*b,c,d,e,f</sup>

6

7 <sup>a</sup> Department of Biomedical Engineering, McCormick School of Engineering, Northwestern  
8 University, Evanston, Illinois.

9 <sup>b</sup> Department of Chemical and Biological Engineering, McCormick School of Engineering,  
10 Northwestern University, Evanston, IL, USA

11 <sup>c</sup> Institute for BioNanotechnology in Medicine (IBNAM), Northwestern University, Chicago, IL,  
12 USA

13 <sup>d</sup> Center for Reproductive Science (CRS), Northwestern University, Evanston, IL, USA

14 <sup>e</sup> Robert H. Lurie Comprehensive Cancer Center, Northwestern University, Chicago, IL, USA

15 <sup>f</sup> Chemistry of Life Processes Institute (CLP), Northwestern University, Evanston, IL, USA

16

17

18

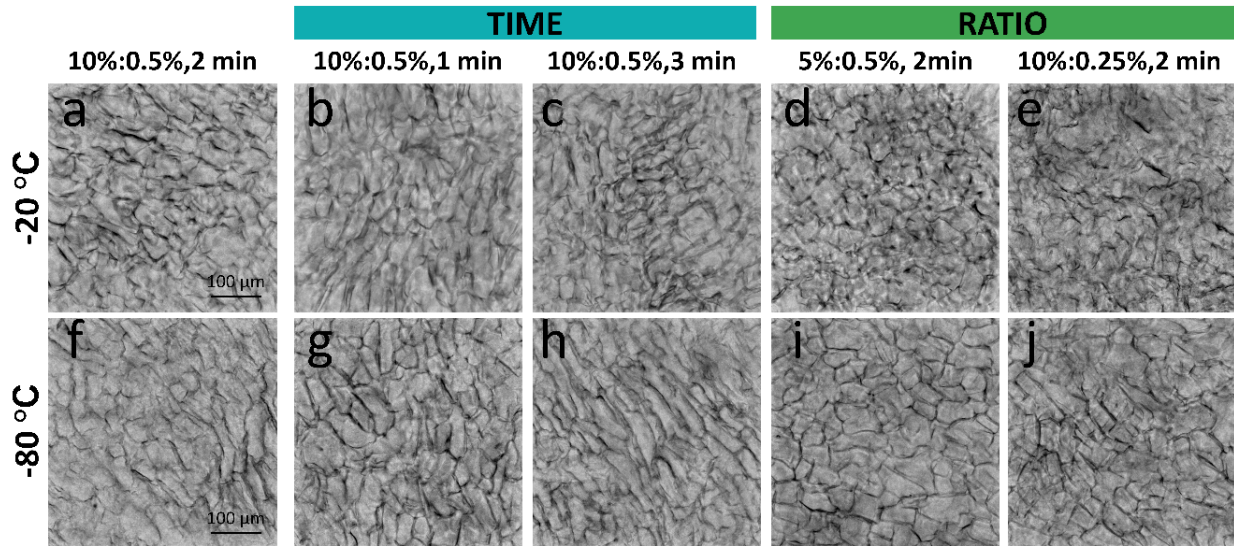

1

2 **Supp. 1.** Influence of (a-c,f-h) crosslinking time, (a,d,e,f,i,j) polymer: initiator ratio, and freezing  
 3 temperature on PEG pore size. Porous hydrogels were prepared at (a-e) -20 °C or (f-j) at -80 °C.

4

|                  |                            | <i>GELATION</i> |                  | <i>PORE STRUCTURE</i>           |      |      |                              | <i>PERMEABILITY</i> |                             |     |                               |     |
|------------------|----------------------------|-----------------|------------------|---------------------------------|------|------|------------------------------|---------------------|-----------------------------|-----|-------------------------------|-----|
|                  |                            | <i>Temp.</i>    | <i>Condition</i> | <i>Diam (μm):<br/>Quartiles</i> |      |      | <i>Porosity (%)<br/>± SD</i> |                     | <i>Swell Ratio<br/>± SD</i> |     | <i>Water (% w/w)<br/>± SD</i> |     |
| <b>TIME</b>      | <b>10%, 0.5% P:I Ratio</b> | -20 °C          | 1 min            | 27.1                            | 30.4 | 33.9 | 97.1                         | 0.0                 | 28.5                        | 0.5 | 96.5                          | 0.1 |
|                  |                            |                 | 2 min            | 23.8                            | 27.0 | 30.5 | 96.4                         | 0.0                 | 23.6                        | 0.3 | 95.8                          | 0.1 |
|                  |                            |                 | 3 min            | 23.6                            | 26.6 | 29.7 | 96.6                         | 0.1                 | 24.6                        | 0.4 | 95.9                          | 0.1 |
|                  |                            | -80 °C          | 1 min            | 32.7                            | 36.8 | 40.5 | 97.8                         | 0.0                 | 47.0                        | 2.5 | 97.9                          | 0.1 |
|                  |                            |                 | 2 min            | 31.4                            | 34.1 | 37.7 | 97.5                         | 0.1                 | 42.9                        | 1.3 | 97.7                          | 0.1 |
|                  |                            |                 | 3 min            | 30.3                            | 33.4 | 37.1 | 97.5                         | 0.1                 | 36.2                        | 1.5 | 97.3                          | 0.2 |
|                  |                            | +20 °C          | 1 min            | -                               | -    | -    | 94.8                         | 0.4                 | 12.5                        | 0.2 | 92.0                          | 0.2 |
|                  |                            |                 | 2 min            | -                               | -    | -    | 94.7                         | 0.1                 | 12.1                        | 0.5 | 91.7                          | 0.3 |
|                  |                            |                 | 3 min            | -                               | -    | -    | 94.8                         | 0.1                 | 11.9                        | 0.2 | 91.6                          | 0.2 |
| <b>P:I RATIO</b> | <b>2 min</b>               | -20 °C          | 5%,0.5%          | 30.8                            | 33.8 | 38.4 | 97.8                         | 0.1                 | 47.1                        | 0.9 | 97.9                          | 0.0 |
|                  |                            |                 | 10%,0.25%        | 25.5                            | 29.9 | 33.3 | 97.2                         | 0.0                 | 27.3                        | 0.8 | 96.3                          | 0.1 |
|                  |                            | -80 °C          | 5%,0.5%          | 31.5                            | 34.7 | 38.9 | 98.5                         | 0.0                 | 71.0                        | 1.2 | 98.6                          | 0.0 |
|                  |                            |                 | 10%,0.25%        | 33.3                            | 37.4 | 41.1 | 97.7                         | 0.1                 | 39.9                        | 0.8 | 97.5                          | 0.1 |
|                  |                            | +20 °C          | 5%,0.5%          | -                               | -    | -    | 97.1                         | 0.1                 | 18.3                        | 0.4 | 94.5                          | 0.1 |
|                  |                            |                 | 10%,0.25%        | -                               | -    | -    | 95.0                         | 0.3                 | 12.2                        | 0.3 | 91.8                          | 0.2 |

1

2 **Table 1.** Influence of crosslinking time, polymer: initiator ratio, and preparation temperature on  
3 PEG hydrogel pore size (n = 4). Porous hydrogels were prepared at -20 °C or at -80 °C.  
4 Hydrogels were prepared at +20 °C. Note that the pore sizes were not normal in distribution  
5 according to the Shapiro-Wilk test; therefore, the interquartile ranges (25%, 50%, 75%) were  
6 provided.

7

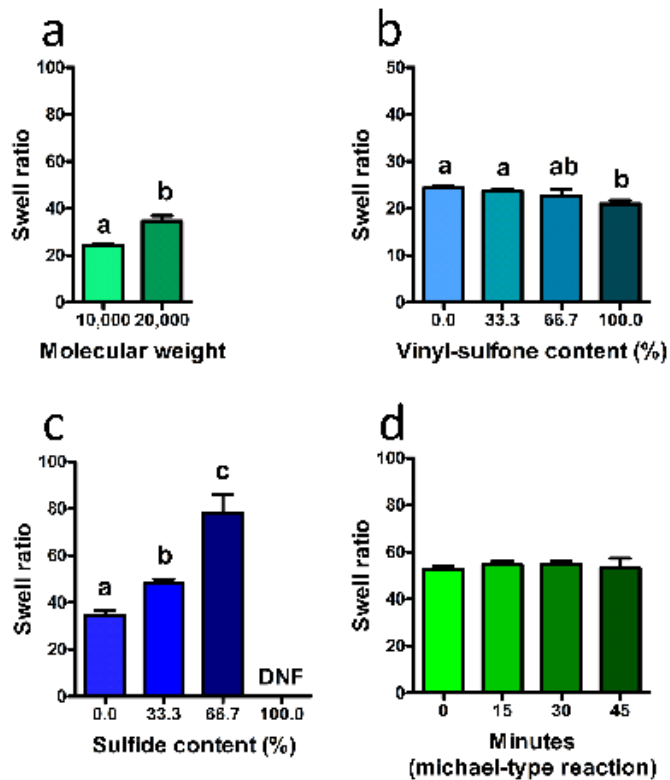

1

2 **Supp. 2.** Influence of PEG parameters on the swelling of 10% polymer, 0.5% photoinitiator  
 3 hydrogels crosslinked for 15s (n = 4). (a) The swelling ratio was determined for varying  
 4 molecular weight using a PEG monomer containing acrylate end-groups. The polymer chemistry  
 5 was also investigated using (b) vinyl-sulfone or (c) thiol terminated PEG, and (d) prior reaction to  
 6 tri-thiol containing peptides using Michael-type addition. Porous hydrogels were prepared at -20  
 7 °C. DNF = gel did not form. Conditions designated with different letters are statistically different  
 8 ( $p < 0.05$ ) using ANOVA with a Bonferonni post-hoc.

9

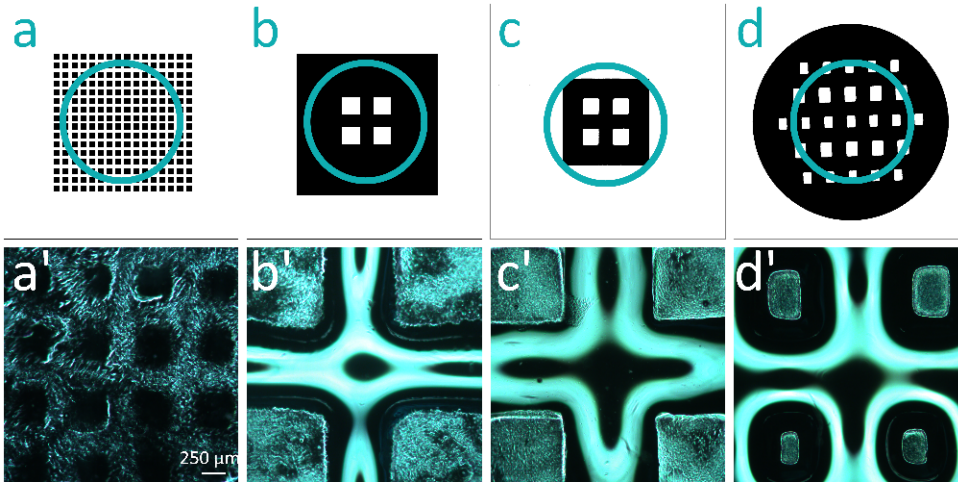

1

2 **Supp. 3.** Photomask-based templation of porous PEG hydrogels using (a,b) laserjet-fabricated  
 3 masks and (c,d) chrome masks. (') Phase microscopy of 10% polymer, 0.5% photoinitiator  
 4 hydrogels prepared at -20 °C using these masks and crosslinked for 1-2min.

5

6

7

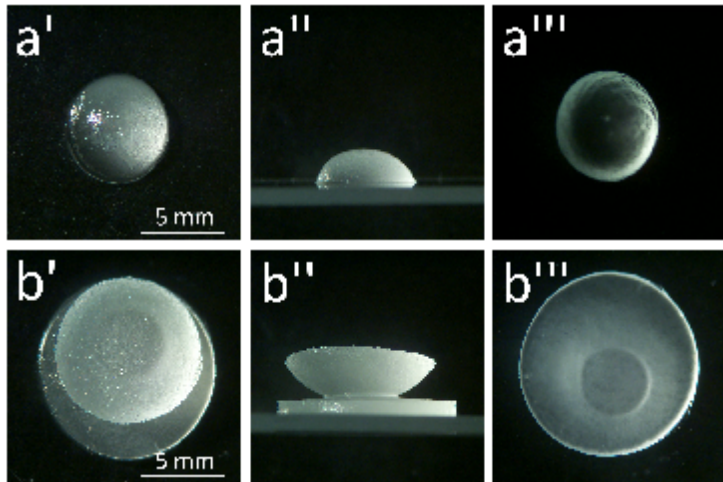

8

9 **Supp. 4.** Porous PEG hydrogel templation by joining rounded frozen solutions. (') denotes aerial  
 10 views, ('', ''') denotes side views.

11

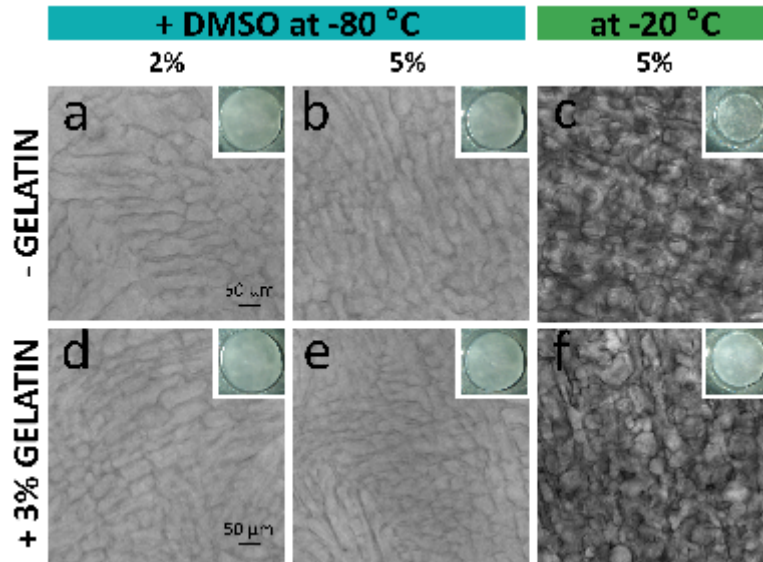

1

2 **Supp. 5.** (a,b,d,e) Influence of DMSO content on porous PEG hydrogel formation with (d,e) and  
 3 without (a,b) gelatin for hydrogels prepared at -80 °C. (c,f) Influence of DMSO on PEG  
 4 hydrogel structure at -20 °C with (c) and without (f) gelatin.
